# Supplementary material for: Structure-dependent luminescent copper nanoclusters: self-assembly and morphological evolution
Source: Royal Society of Chemistry journal article supplement (doi:10.1039/d0nj04427j), 2020-01-01
Supplement: d0nj04427j1.pdf [file d0nj04427j1.pdf]

# Supporting Information

Structure-dependent Luminescent Copper Nanoclusters:

Self-assembly and Morphological Evolution

Bingyan Han <sup>a,b</sup> \*, Ze Xin <sup>a,b</sup>, Qifang Yan <sup>a,b</sup>, Qin Yan <sup>a,b</sup>, Jingmei Jiang <sup>a,b</sup>

<sup>a</sup> State Key Laboratory of Fine Chemicals, Dalian University of Technology, Dalian 116023, China.

<sup>b</sup> School of Chemical Engineering, Dalian University of Technology, Panjin 124221, China.

\*Corresponding author E-mail: [byhan@dlut.edu.cn](mailto:byhan@dlut.edu.cn); Tel: +86427-2631820

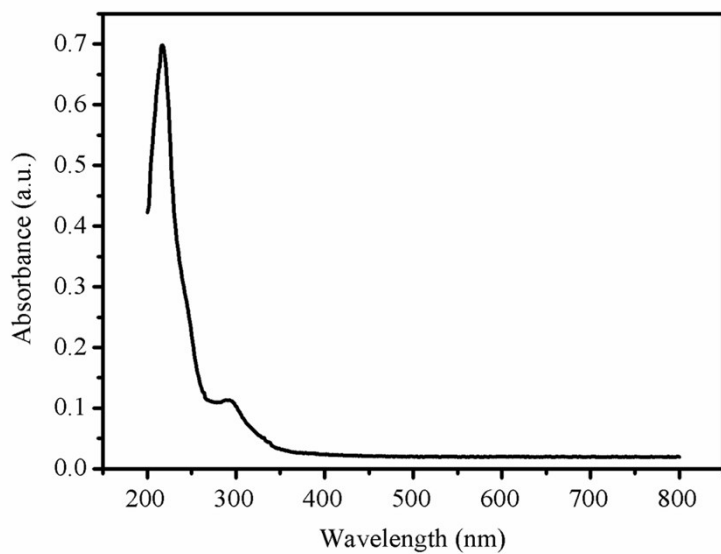

**Figure S1.** UV-Vis absorption spectrum of CuNCs@m-AT.

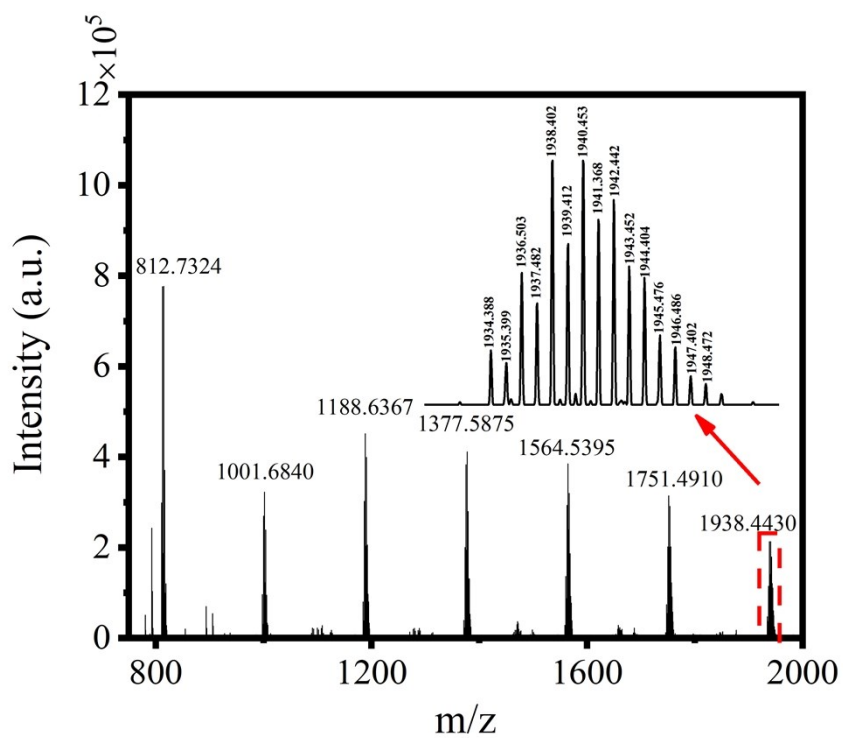

**Figure S2.** ESI-MS spectrum of CuNCs@m-AT. Inset shows isotopic patterns of peak at 1938.443.

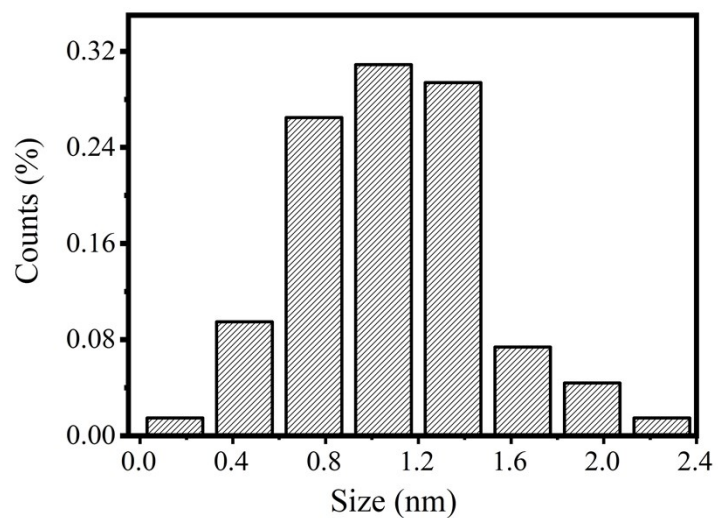

**Figure S3.** TEM size distribution of CuNCs@m-AT.

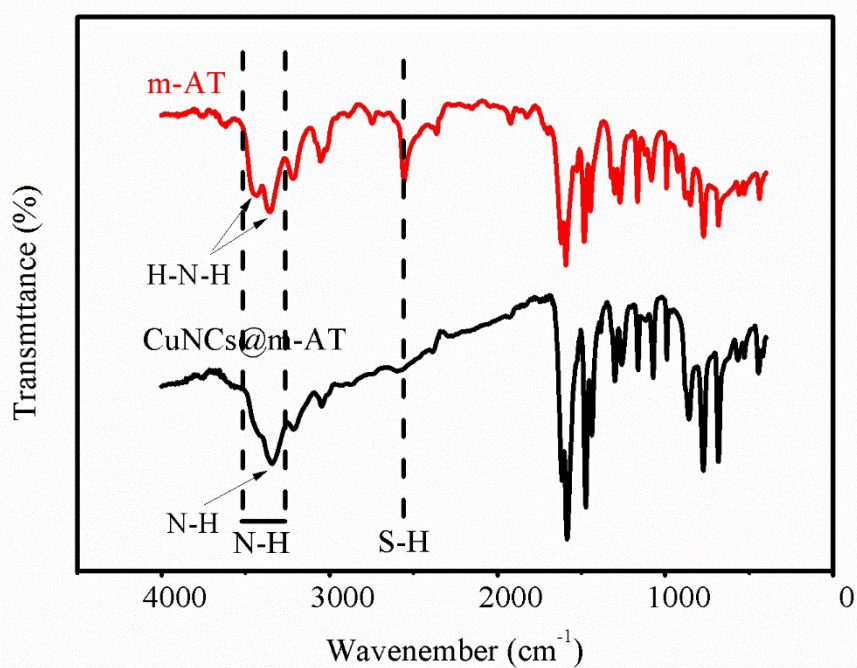

**Figure S4.** FTIR spectra of m-AT and CuNCs@m-AT.

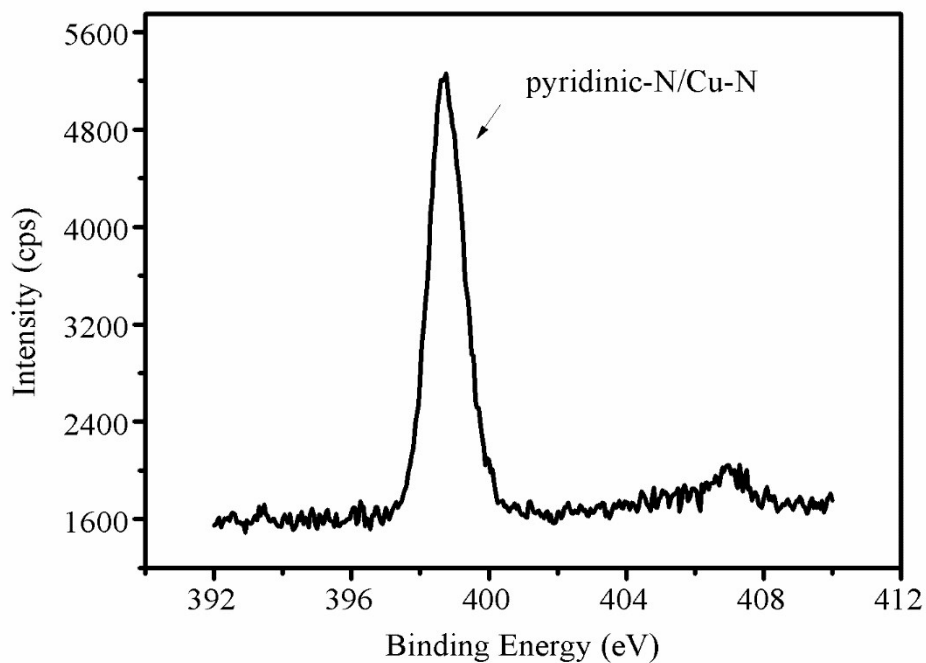

**Figure S5.** XPS N1s spectrum of CuNCs@m-AT.

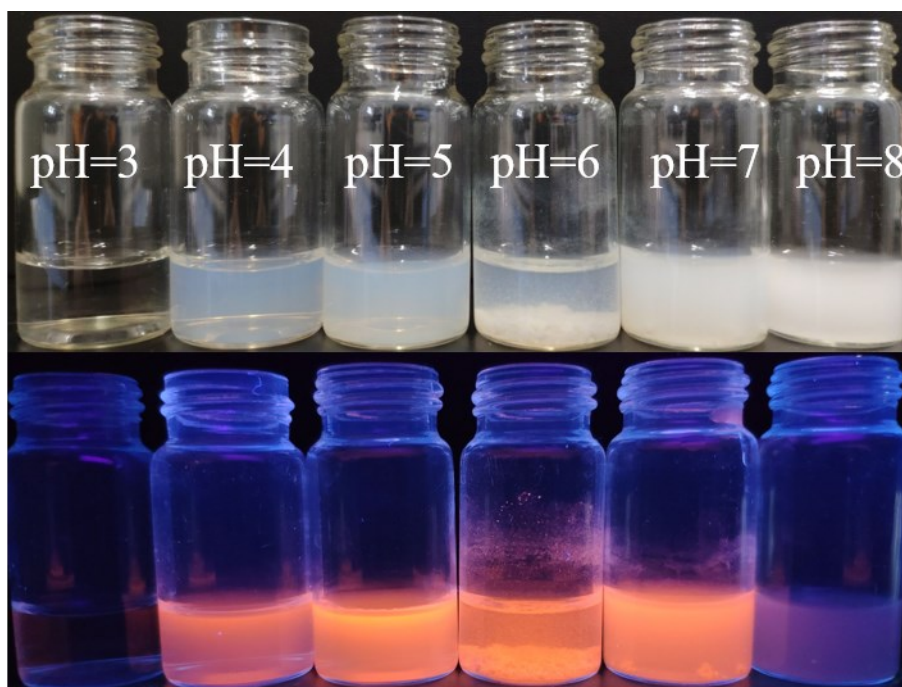

**Figure S6.** Photographs of CuNCs@m-AT in various pH (3,4,5,6,7,8) under ambient light (above) and 365 nm light (below) respectively.

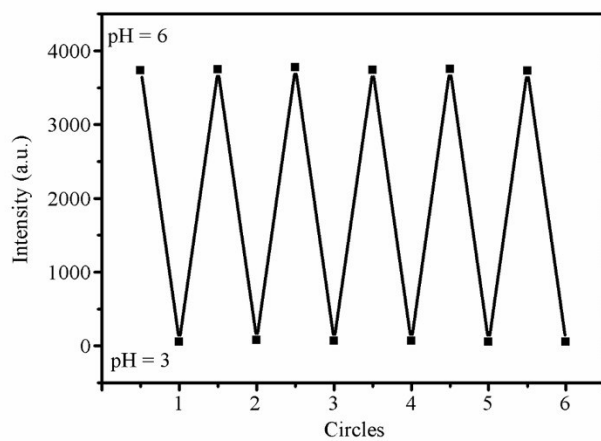

**Figure S7.** Reversibility of the pH-dependent emission of the CuNCs@m-AT between pH 3 and 6.

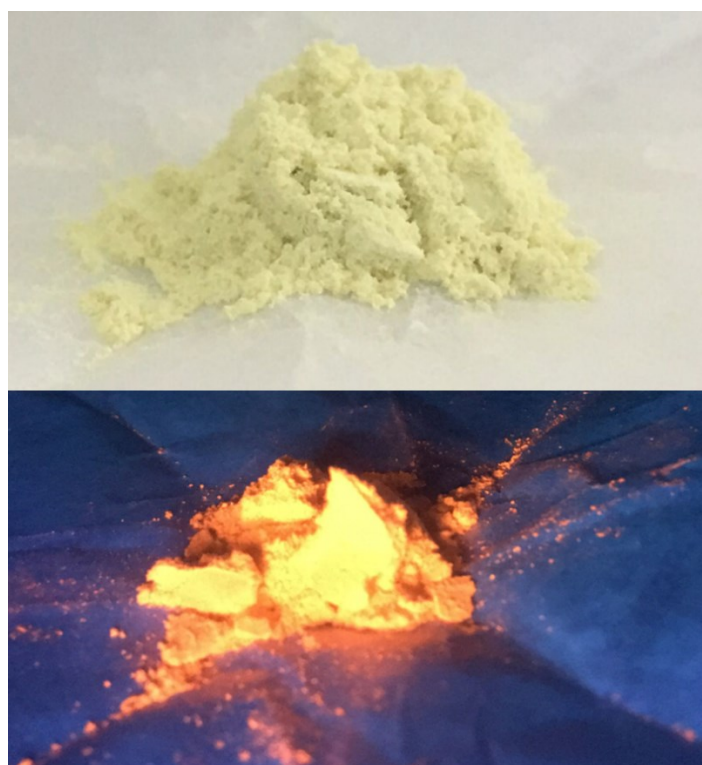

**Figure S8.** Photographs of solids of CuNCs@m-AT (pH=6) under ambient light (above) and 365 nm light (below) respectively.

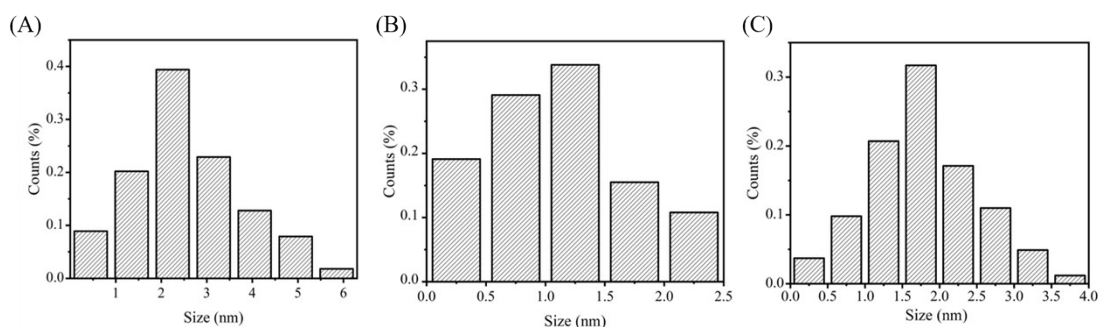

**Figure S9.** Inter-CuNCs@m-AT distances of distribution at (A) pH=4/5;(B) pH=6;(C) pH=7.

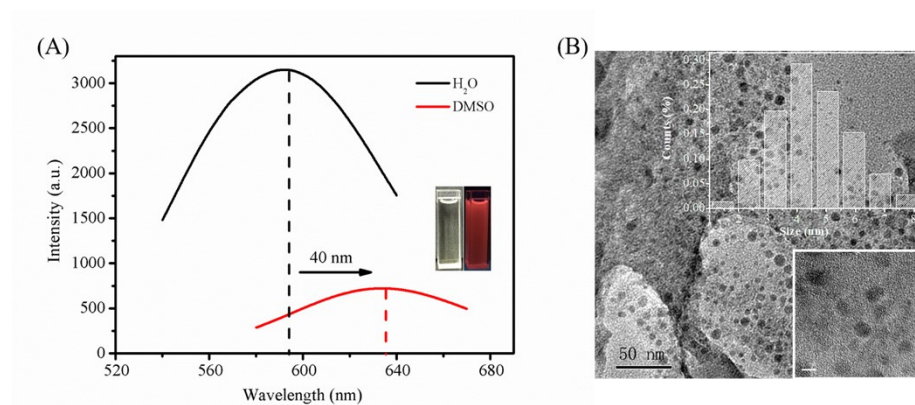

**Figure S10.** (A) Luminescence emission spectra of CuNCs@m-AT in DMSO and water. Inset: Photographs of CuNCs@m-AT solution in DMSO (under ambient light and 365 nm light respectively); (B) TEM image of CuNCs@m-AT in DMSO. Inset: TEM size distribution of the CuNCs@m-AT and high magnification TEM images (5 nm).

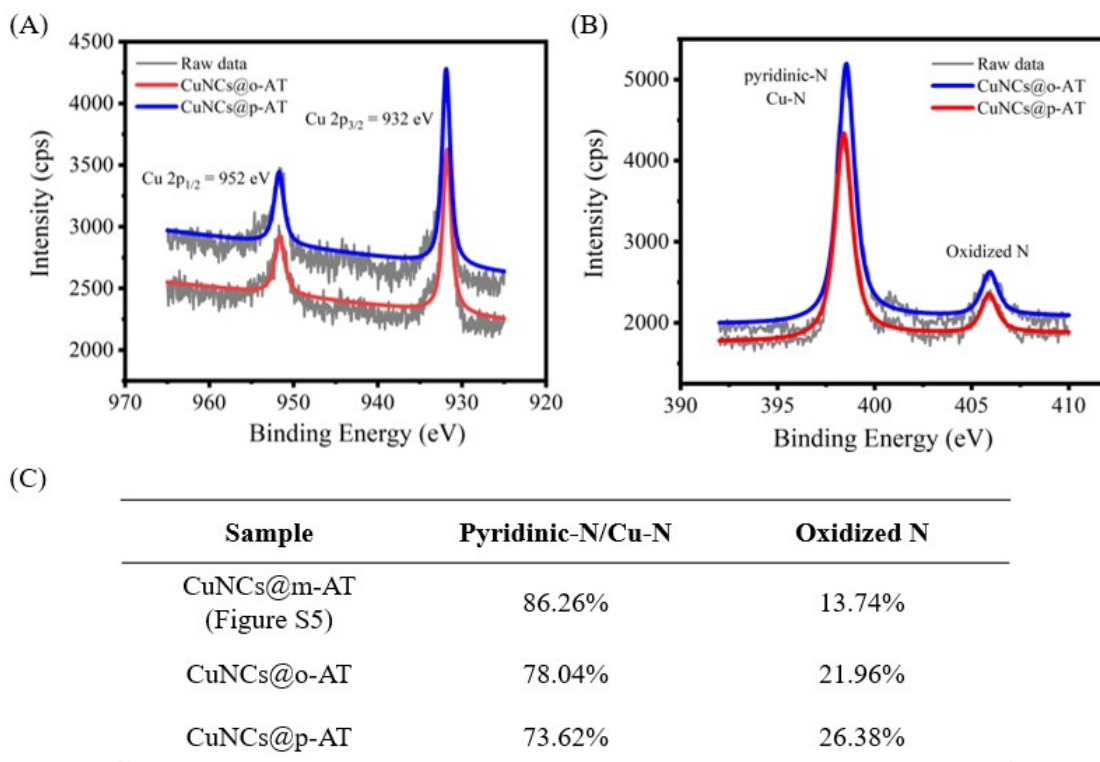

**Figure S11.** CuNCs@o-AT and CuNCs@p-AT of (A) XPS Cu 2p spectra and (B) XPS N 1s spectra. (C) XPS data analyses of the N 1s spectra of CuNCs@o-AT, CuNCs@m-AT and CuNCs@p-AT.
